# Supplementary material
Source: PubMed Central journal article supplement (PMC5901709)

### A BLaER1 Monocytes with *F. novicida*

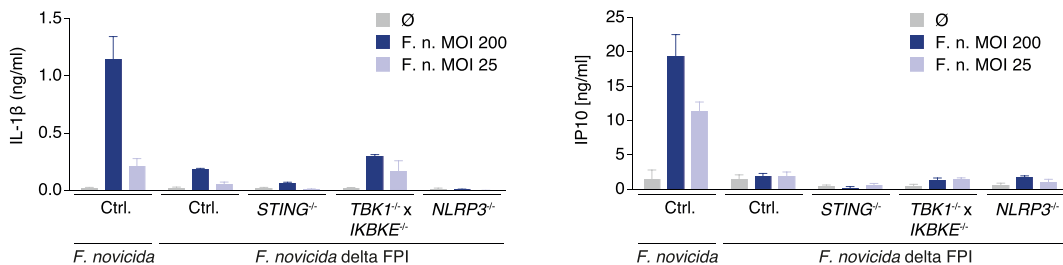

### B Primary Monocytes with MVA

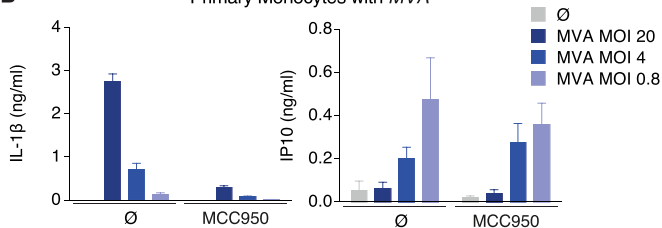

### C Human Bone Marrow

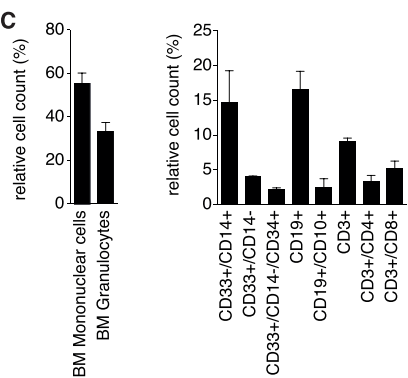

### D Human BMDM

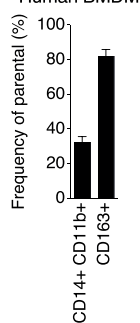

### E Human BMDM

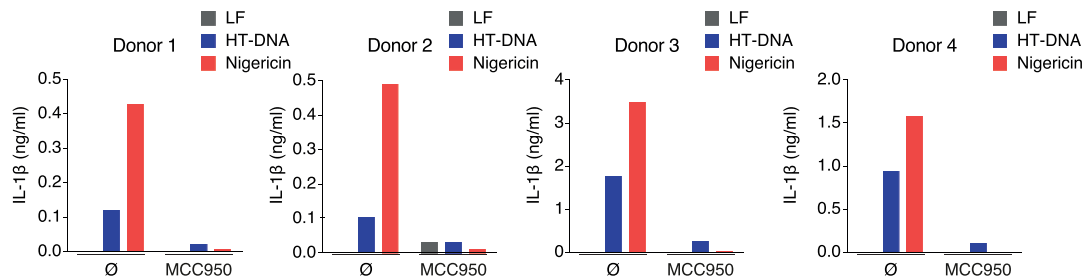

Supplement: NIHMS77020-supplement-Supplementary_figure_7.pdf [file NIHMS77020-supplement-Supplementary_figure_7.pdf]
