# Supplementary material
Source: PubMed Central journal article supplement (PMC5901709)

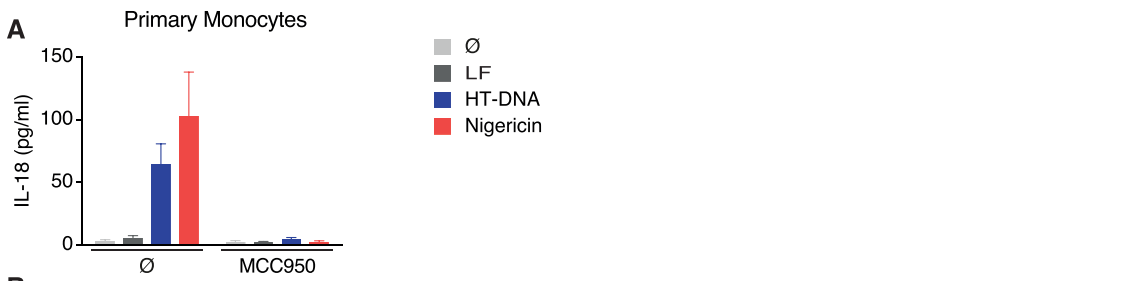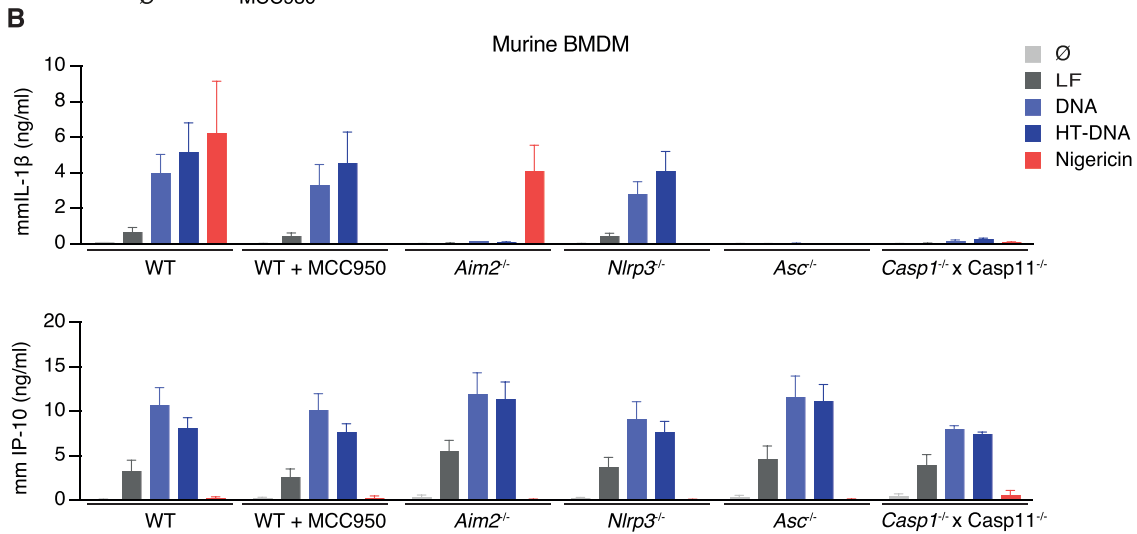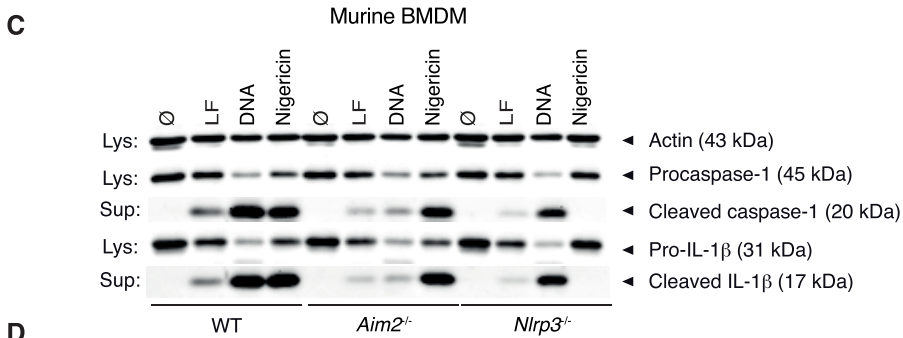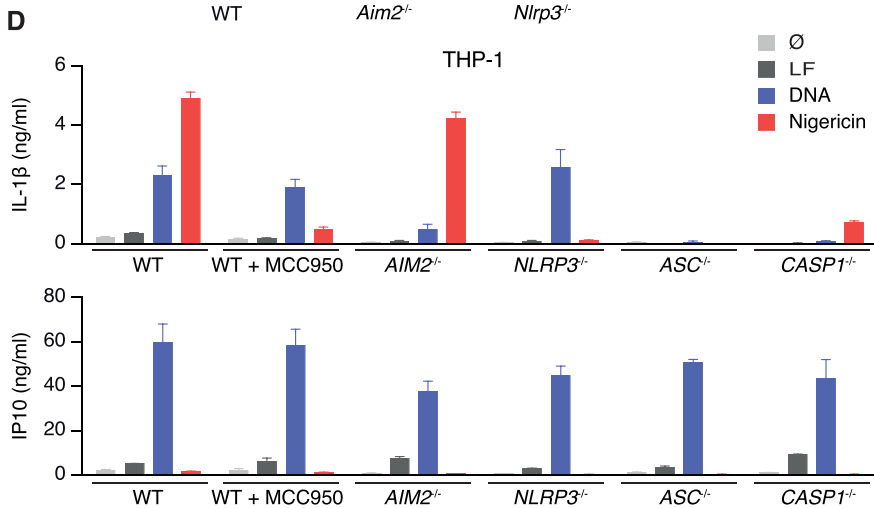

Supplement: NIHMS77020-supplement-Supplementary_figure_1.pdf [file NIHMS77020-supplement-Supplementary_figure_1.pdf]

**A**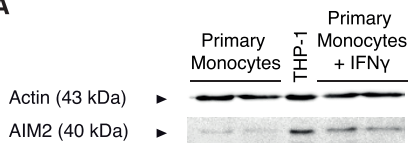**B**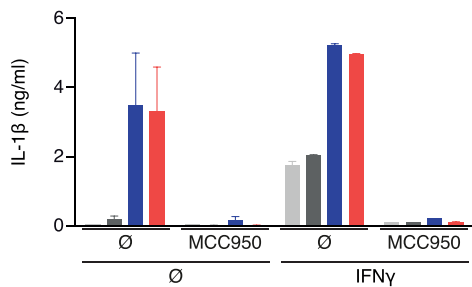

Primary Monocytes

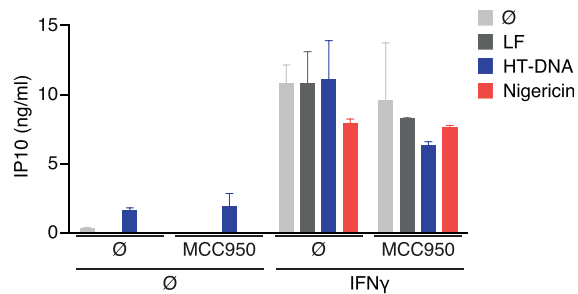**C**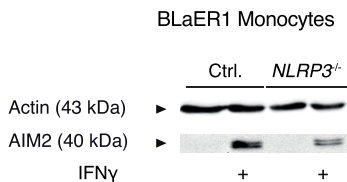**D**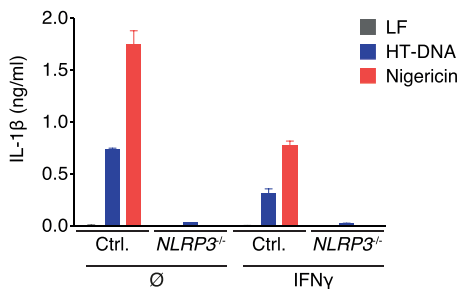

BLaER1 Monocytes

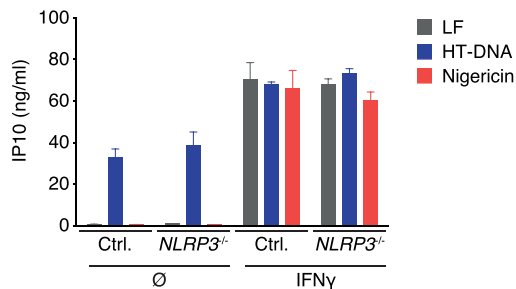

Supplement: NIHMS77020-supplement-Supplementary_figure_2.pdf [file NIHMS77020-supplement-Supplementary_figure_2.pdf]

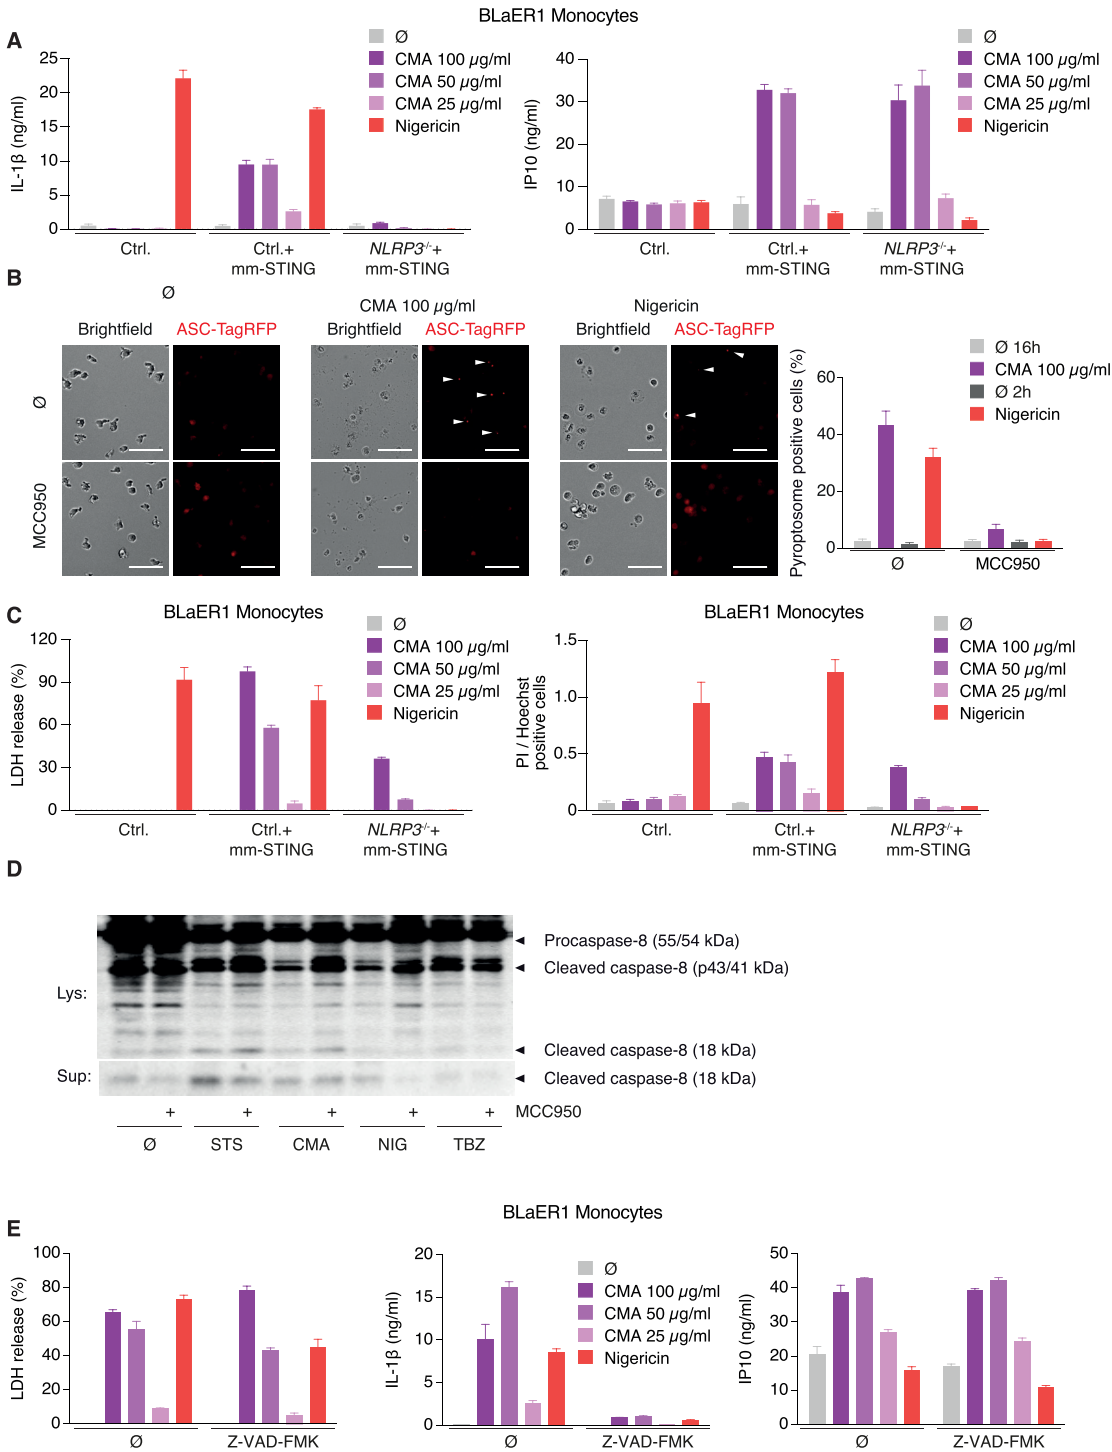

Supplement: NIHMS77020-supplement-Supplementary_figure_3.pdf [file NIHMS77020-supplement-Supplementary_figure_3.pdf]

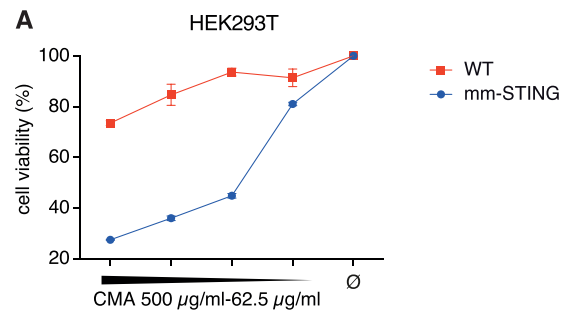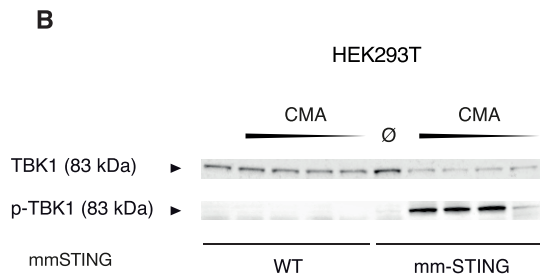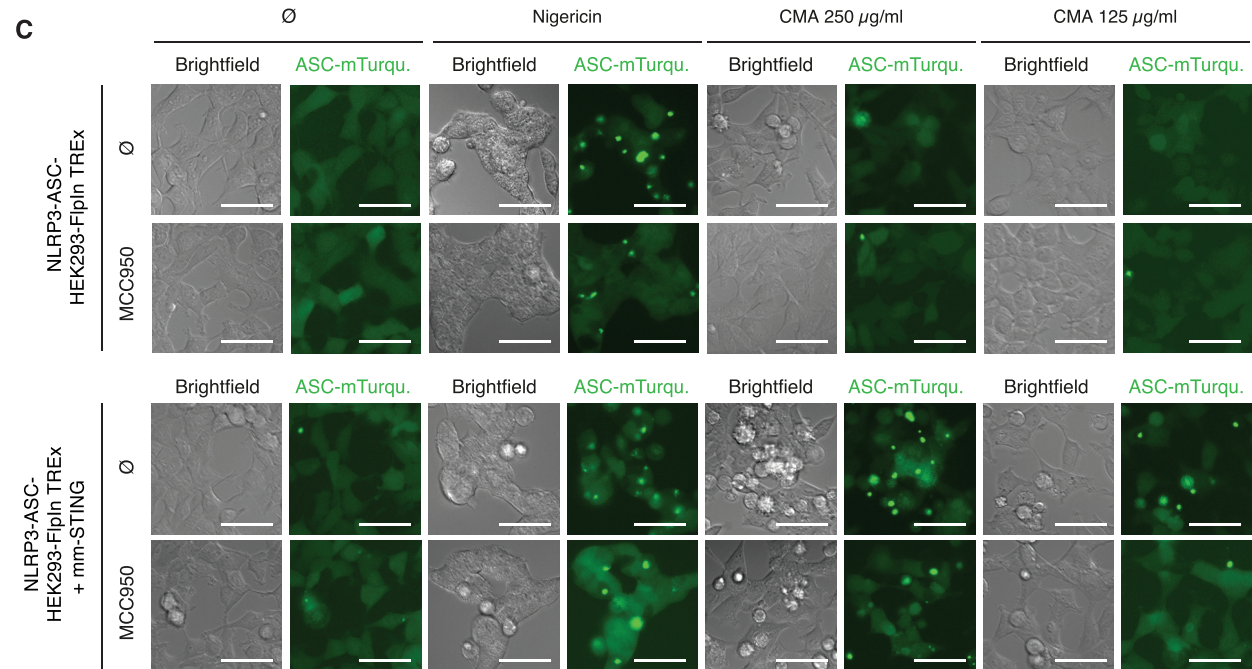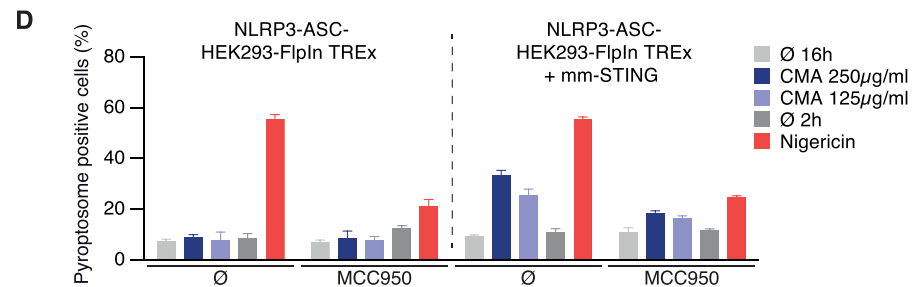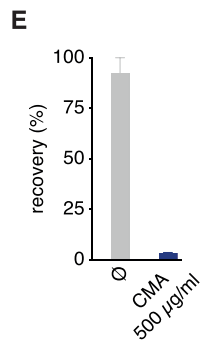

Supplement: NIHMS77020-supplement-Supplementary_figure_4.pdf [file NIHMS77020-supplement-Supplementary_figure_4.pdf]

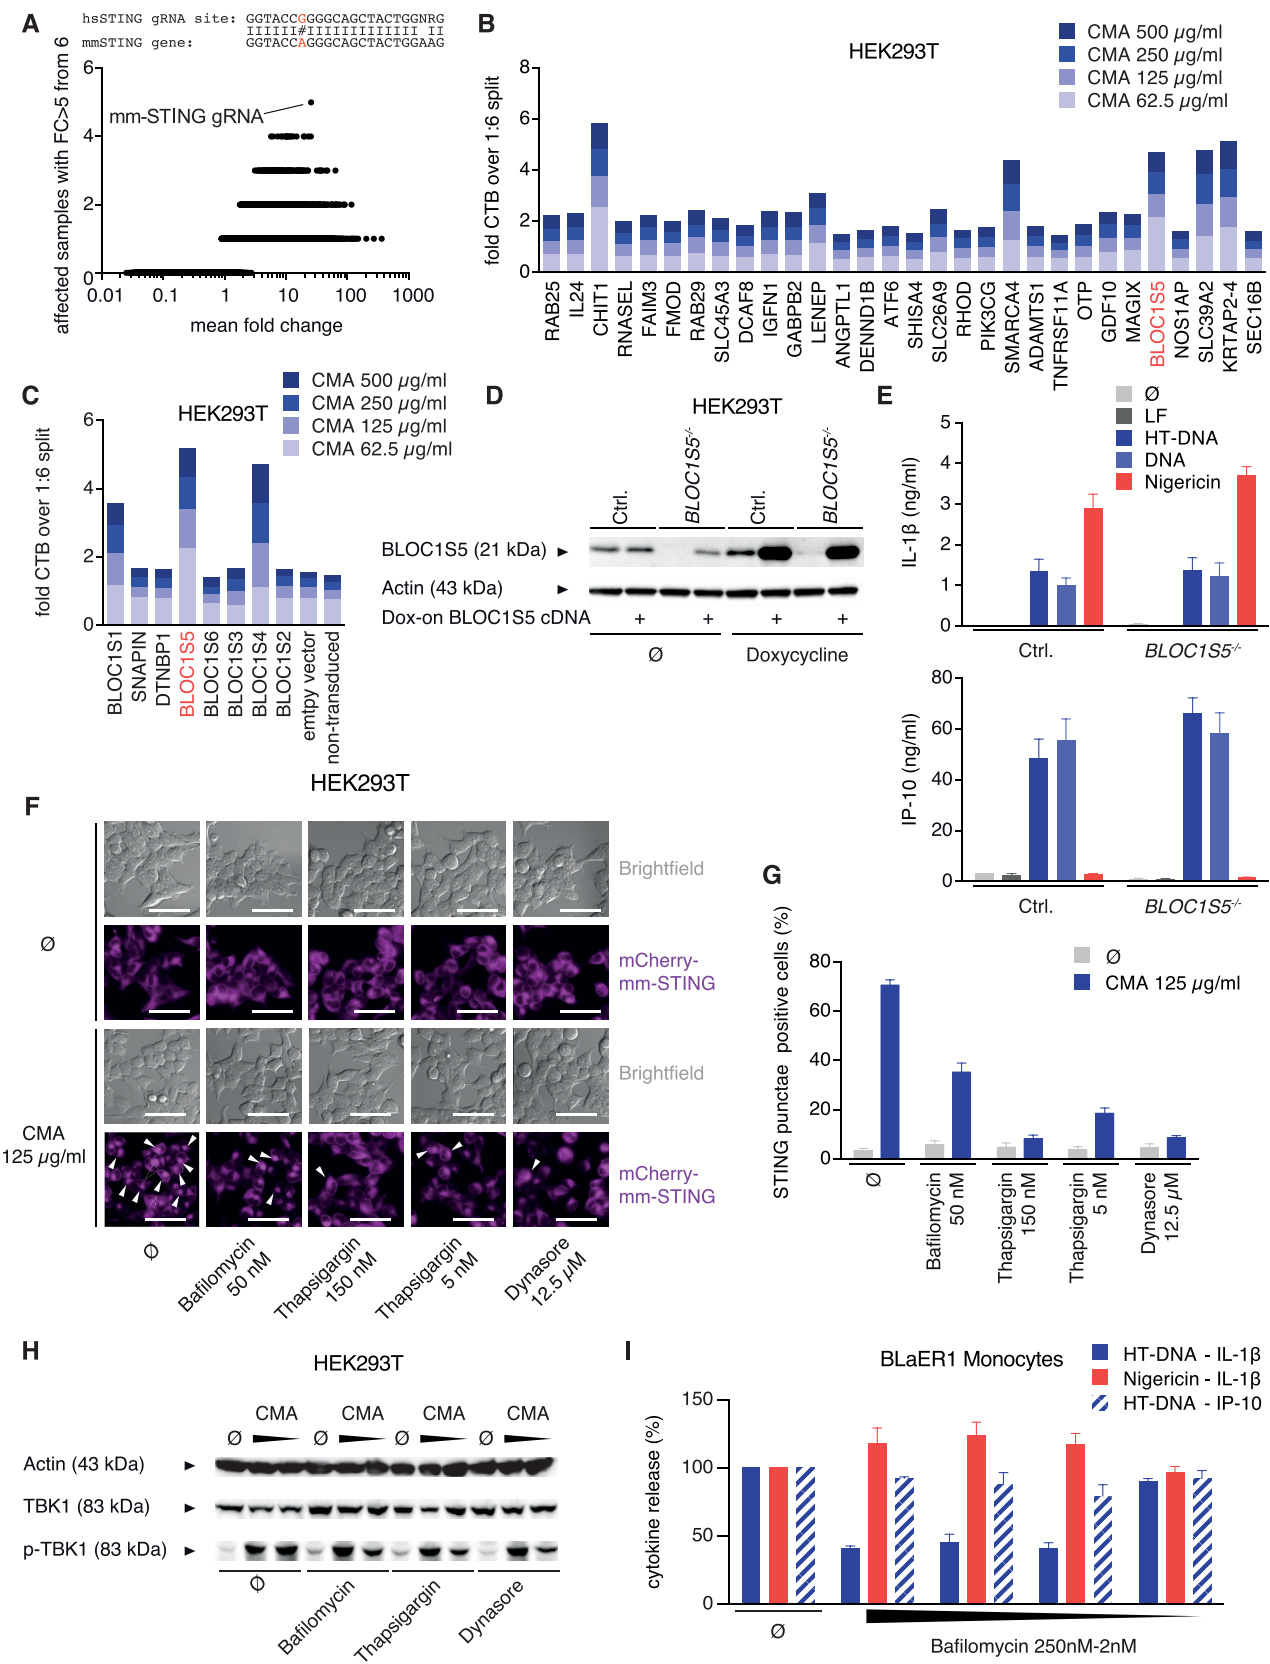

Supplement: NIHMS77020-supplement-Supplementary_figure_5.pdf [file NIHMS77020-supplement-Supplementary_figure_5.pdf]

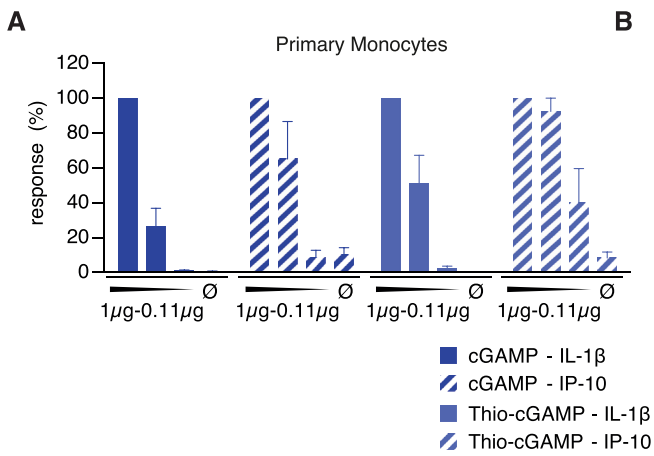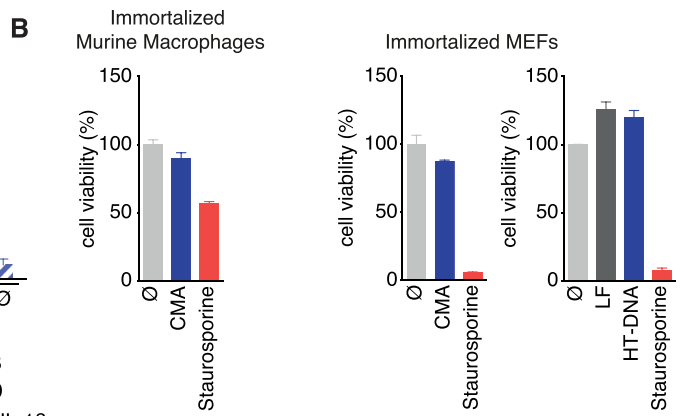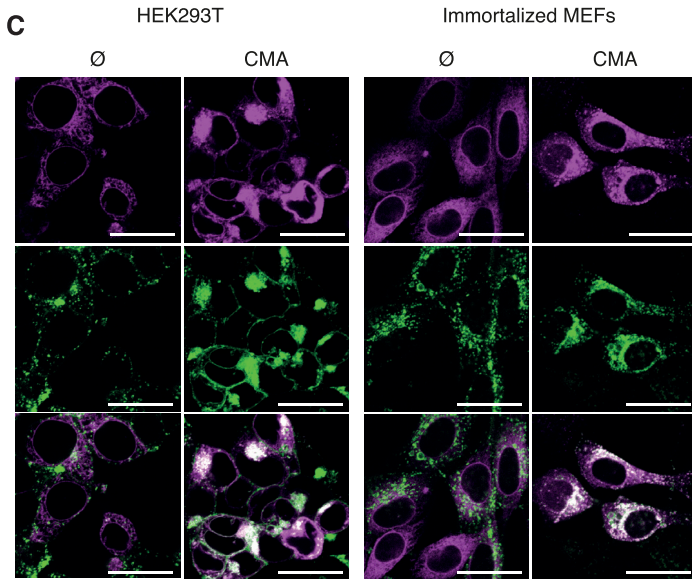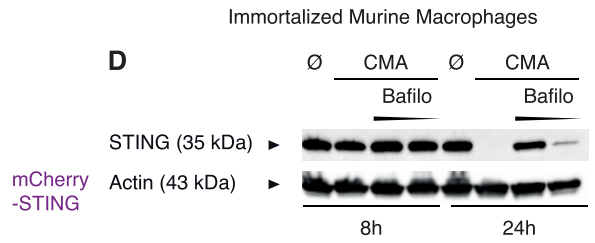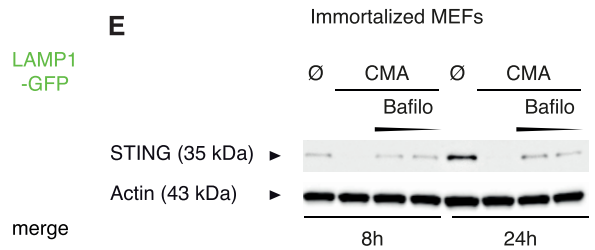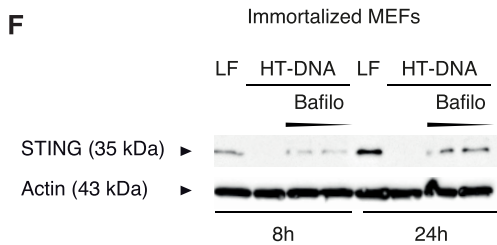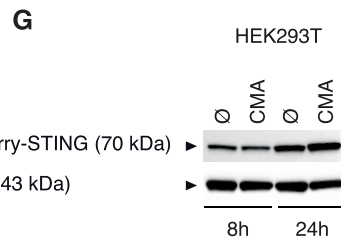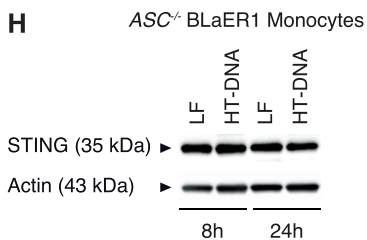

Supplement: NIHMS77020-supplement-Supplementary_figure_6.pdf [file NIHMS77020-supplement-Supplementary_figure_6.pdf]
